# Supplementary material for: Incidence Rates of Infections, Malignancies, Thromboembolism, and Cardiovascular Events in an Alopecia Areata Cohort from a US Claims Database
Source: PubMed Central journal article supplement — Dermatol Ther (Heidelb). 2023 Jun 10;13(8):1733–46. doi: 10.1007/s13555-023-00937-9 (PMC10366041; doi:10.1007/s13555-023-00937-9), 2023-06-10
Supplement: 13555_2023_937_MOESM1_ESM.pdf [file 13555_2023_937_MOESM1_ESM.pdf]

## **SUPPLEMENTARY MATERIAL**

### **Incidence rates of infections, malignancies, thromboembolisms, and cardiovascular events in an alopecia areata cohort from a US claims database**

Prethibha George<sup>1</sup>, Oladayo Jagun<sup>1</sup>, Qing Liu<sup>1</sup>, Charles Wentworth<sup>1</sup>, Lynne Napatalung<sup>1,2</sup>, Robert Wolk<sup>3</sup>, Susan Anway<sup>3</sup>, Samuel H. Zwillich<sup>3</sup>

<sup>1</sup>Pfizer Inc., New York, NY, USA; <sup>2</sup>Mount Sinai Hospital, New York, NY, USA; <sup>3</sup>Pfizer Inc., Groton, CT, USA

#### **Corresponding author:**

Oladayo Jagun, MD, MPH

Pfizer Inc.

66 Hudson Blvd. East

New York, NY 10001

Email: [oladayo.jagun@pfizer.com](mailto:oladayo.jagun@pfizer.com)

**Table S1.** Incidence Proportions and Incidence Rates per 1000 Person-Years for Outcome Events of Interest in the AA and Matched Non-AA Cohorts

| Outcome Events                              | AA cohort<br>(n=8784) <sup>a</sup> |                  | Non-AA cohort<br>(n=26,352) <sup>a</sup> |                  |
|---------------------------------------------|------------------------------------|------------------|------------------------------------------|------------------|
|                                             | n (IP)                             | IR (95% CI)      | n (IP)                                   | IR (95% CI)      |
| Serious infection requiring hospitalization | 281 (3.2)                          | 18.5 (16.5-20.8) | 1238 (4.7)                               | 20.6 (19.5-21.8) |
| Herpes zoster infection                     | 119 (1.4)                          | 7.8 (6.5-9.3)    | 463 (1.8)                                | 7.6 (6.9-8.3)    |
| Herpes simplex infection                    | 294 (3.3)                          | 19.5 (17.4-21.8) | 592 (2.2)                                | 9.7 (9.0-10.5)   |
| Any primary malignancy <sup>b</sup>         | 181 (2.2)                          | 12.5 (10.8-14.5) | 680 (2.7)                                | 11.6 (10.8-12.6) |
| BCC                                         | 118 (1.4)                          | 7.8 (6.5-9.4)    | 382 (1.5)                                | 6.3 (5.7-7.0)    |
| SCC                                         | 79 (0.9)                           | 5.2 (4.2-6.5)    | 246 (0.9)                                | 4.0 (3.6-4.6)    |
| Malignant melanoma                          | 22 (0.3)                           | 1.4 (0.9-2.2)    | 58 (0.2)                                 | 0.9 (0.7-1.2)    |
| Lymphoma                                    | 19 (0.2)                           | 1.2 (0.8-1.9)    | 46 (0.2)                                 | 0.8 (0.6-1.0)    |
| Female breast cancer                        | 39 (0.8)                           | 4.6 (3.3-6.3)    | 161 (1.1)                                | 4.7 (4.0-5.5)    |
| Cervical carcinoma in situ                  | 8 (0.1)                            | 0.5 (0.3-1.0)    | 23 (0.1)                                 | 0.4 (0.3-0.6)    |

|                                           |           |                  |            |                  |
|-------------------------------------------|-----------|------------------|------------|------------------|
| MACE                                      | 234 (2.8) | 16.0 (14.1-18.2) | 1052 (4.1) | 18.1 (17.0-19.2) |
| Cardiovascular death                      | 23 (0.3)  | 1.5 (1.0-2.2)    | 169 (0.6)  | 2.7 (2.4-3.2)    |
| Acute MI                                  | 46 (0.5)  | 3.0 (2.2-4.0)    | 294 (1.1)  | 4.8 (4.3-5.4)    |
| Unstable angina                           | 18 (0.2)  | 1.2 (0.7-1.9)    | 115 (0.4)  | 1.9 (1.6-2.2)    |
| Ischemic stroke                           | 131 (1.5) | 8.7 (7.3-10.3)   | 478 (1.8)  | 7.9 (7.2-8.7)    |
| Hemorrhagic stroke                        | 36 (0.4)  | 2.3 (1.7-3.2)    | 102 (0.4)  | 1.7 (1.4-2.0)    |
| Hospitalization due to heart failure      | 74 (0.9)  | 4.8 (3.9-6.1)    | 432 (1.7)  | 7.1 (6.5-7.8)    |
| Coronary revascularization by PCI or CABG | 45 (0.5)  | 2.9 (2.2-3.9)    | 273 (1.0)  | 4.5 (4.0-5.1)    |
| DVT                                       | 46 (0.5)  | 3.0 (2.3-4.0)    | 245 (0.9)  | 4.0 (3.5-4.5)    |
| PE                                        | 30 (0.3)  | 2.0 (1.4-2.8)    | 137 (0.5)  | 2.2 (1.9-2.6)    |
| DVT or PE                                 | 65 (0.7)  | 4.3 (3.3-5.4)    | 329 (1.3)  | 5.4 (4.9-6.0)    |
| ATE                                       | 13 (0.1)  | 0.8 (0.5-1.5)    | 57 (0.2)   | 0.9 (0.7-1.2)    |
| DVT or PE or ATE                          | 74 (0.9)  | 4.9 (3.9-6.1)    | 370 (1.4)  | 6.1 (5.5-6.7)    |
| All-cause death                           | 64 (0.7)  | 4.1 (3.2-5.3)    | 469 (1.8)  | 7.6 (6.9-8.3)    |

---

<sup>a</sup> The total number of patients at risk (i.e. denominator) differed depending on whether the outcome event was chronic or acute.

Therefore, the denominator was not always 8784 for the AA cohort or 26,352 for the non-AA cohort.

<sup>b</sup> Excluding nonmelanoma skin cancer.

AA, alopecia areata; ATE, arterial thromboembolism; BCC, basal cell carcinoma; CABG, coronary artery bypass graft; DVT, deep vein thrombosis; IP, incidence proportion; IR, incidence rate; MACE, major adverse cardiovascular event; MI, myocardial infarction; PCI, percutaneous coronary intervention; PE, pulmonary embolism SCC, squamous cell carcinoma.

**Table S2.** Incidence Proportions and Incidence Rates per 1000 Person-Years for Outcome Events of Interest in the AA and Matched Non-AA Cohorts, ages 12-17 years

| Outcome Events                              | AA cohort<br>(n=398) <sup>a</sup> |                | Non-AA cohort<br>(n=1194) <sup>a</sup> |                |
|---------------------------------------------|-----------------------------------|----------------|----------------------------------------|----------------|
|                                             | n (IP)                            | IR (95% CI)    | n (IP)                                 | IR (95% CI)    |
| Serious infection requiring hospitalization | 2 (0.5)                           | 2.6 (0.6-10.3) | 6 (0.5)                                | 2.2 (1.0-4.9)  |
| Herpes zoster infection                     | 0                                 | 0              | 2 (0.2)                                | 0.7 (0.2-2.9)  |
| Herpes simplex infection                    | 5 (1.3)                           | 6.5 (2.7-15.6) | 19 (1.6)                               | 7.0 (4.5-11.0) |
| Any primary malignancy <sup>b</sup>         | 0                                 | 0              | 2 (0.2)                                | 0.7 (0.2-2.9)  |
| BCC                                         | 0                                 | 0              | 1 (0.08)                               | 0.4 (0.05-2.6) |
| SCC                                         | 0                                 | 0              | 0                                      | 0              |
| Malignant melanoma                          | 0                                 | 0              | 0                                      | 0              |
| Lymphoma                                    | 0                                 | 0              | 0                                      | 0              |
| Female breast cancer                        | 0                                 | 0              | 0                                      | 0              |
| Cervical carcinoma in situ                  | 0                                 | 0              | 0                                      | 0              |

|                                           |         |               |          |                |
|-------------------------------------------|---------|---------------|----------|----------------|
| MACE                                      | 1 (0.3) | 1.3 (0.2-9.1) | 1 (0.08) | 0.4 (0.05-2.6) |
| Cardiovascular death                      | 0       | 0             | 0        | 0              |
| Acute MI                                  | 0       | 0             | 0        | 0              |
| Unstable angina                           | 0       | 0             | 0        | 0              |
| Ischemic stroke                           | 1 (0.3) | 1.3 (0.2-9.1) | 1 (0.08) | 0.4 (0.05-2.6) |
| Hemorrhagic stroke                        | 0       | 0             | 0        | 0              |
| Hospitalization due to heart failure      | 0       | 0             | 0        | 0              |
| Coronary revascularization by PCI or CABG | 0       | 0             | 0        | 0              |
| DVT                                       | 0       | 0             | 0        | 0              |
| PE                                        | 0       | 0             | 0        | 0              |
| DVT or PE                                 | 0       | 0             | 0        | 0              |
| ATE                                       | 0       | 0             | 0        | 0              |
| DVT or PE or ATE                          | 0       | 0             | 0        | 0              |
| All-cause death                           | 1 (0.3) | 1.3 (0.2-9.1) | 1 (0.08) | 0.4 (0.05-2.6) |

---

<sup>a</sup> The total number of patients at risk (i.e., denominator) differed depending on whether the outcome event was chronic or acute.

Therefore, the denominator was not always 398 for the AA cohort and 1194 for the non-AA cohort.

<sup>b</sup> Excluding nonmelanoma skin cancer.

AA, alopecia areata; AT, alopecia totalis; ATE, arterial thromboembolism; AU, alopecia universalis; BCC, basal cell carcinoma;

CABG, coronary artery bypass graft; DVT, deep vein thrombosis; IP, incidence proportion; IR, incidence rate; MACE, major adverse cardiovascular event; MI, myocardial infarction; PCI, percutaneous coronary intervention; PE, pulmonary embolism SCC, squamous cell carcinoma.

**Table S3.** Incidence Proportions and Incidence Rates per 1000 Person-Years for Outcome Events of Interest in the AA and Matched Non-AA Cohorts, ages 18-50 years

| Outcome Events                              | AA cohort<br>(n=5083) <sup>a</sup> |                  | Non-AA cohort<br>(n=15,249) <sup>a</sup> |                 |
|---------------------------------------------|------------------------------------|------------------|------------------------------------------|-----------------|
|                                             | n (IP)                             | IR (95% CI)      | n (IP)                                   | IR (95% CI)     |
| Serious infection requiring hospitalization | 59 (1.1)                           | 7.1 (5.5-9.2)    | 224 (1.5)                                | 6.8 (6.0-7.8)   |
| Herpes zoster infection                     | 36 (0.7)                           | 4.3 (3.1-6.0)    | 136 (0.9)                                | 4.1 (3.5-4.9)   |
| Herpes simplex infection                    | 169 (3.3)                          | 20.7 (17.8-24.1) | 346 (2.3)                                | 10.6 (9.5-11.8) |
| Any primary malignancy <sup>b</sup>         | 44 (0.9)                           | 5.4 (4.0-7.2)    | 114 (0.8)                                | 3.5 (2.9-4.2)   |
| BCC                                         | 24 (0.5)                           | 2.9 (1.9-4.3)    | 64 (0.4)                                 | 1.9 (1.5-2.5)   |
| SCC                                         | 5 (0.1)                            | 0.6 (0.3-1.4)    | 14 (0.09)                                | 0.4 (0.3-0.7)   |
| Malignant melanoma                          | 6 (0.1)                            | 0.7 (0.3-1.6)    | 9 (0.06)                                 | 0.3 (0.1-0.5)   |
| Lymphoma                                    | 9 (0.2)                            | 1.1 (0.6-2.1)    | 9 (0.06)                                 | 0.3 (0.1-0.5)   |
| Female breast cancer                        | 7 (0.3)                            | 1.9 (0.9-4.0)    | 30 (0.4)                                 | 2.0 (1.4-2.9)   |
| Cervical carcinoma in situ                  | 7 (0.1)                            | 0.8 (0.4-1.8)    | 18 (0.1)                                 | 0.5 (0.3-0.9)   |



|                                           |          |                |           |                 |
|-------------------------------------------|----------|----------------|-----------|-----------------|
| MACE                                      | 41 (0.8) | 5.0 (3.7-6.8)  | 130 (0.9) | 4.0 (3.3-4.7)   |
| Cardiovascular death                      | 0        | 0              | 2 (0.01)  | 0.06 (0.02-0.2) |
| Acute MI                                  | 6 (0.1)  | 0.7 (0.3-1.6)  | 34 (0.2)  | 1.0 (0.7-1.44)  |
| Unstable angina                           | 1 (0.02) | 0.1 (0.02-0.9) | 19 (0.1)  | 0.6 (0.4-0.9)   |
| Ischemic stroke                           | 30 (0.6) | 3.6 (2.5-5.2)  | 57 (0.4)  | 1.7 (1.3-2.2)   |
| Hemorrhagic stroke                        | 7 (0.1)  | 0.8 (0.4-1.8)  | 17 (0.1)  | 0.5 (0.3-0.8)   |
| Hospitalization due to heart failure      | 3 (0.06) | 0.4 (0.1-1.1)  | 19 (0.1)  | 0.6 (0.4-0.9)   |
| Coronary revascularization by PCI or CABG | 5 (0.1)  | 0.6 (0.3-1.4)  | 31 (0.2)  | 0.9 (0.7-1.3)   |
| DVT                                       | 11 (0.2) | 1.3 (0.7-2.4)  | 56 (0.4)  | 1.7 (1.3-2.2)   |
| PE                                        | 12 (0.2) | 1.4 (0.8-2.5)  | 32 (0.2)  | 1.0 (0.7-1.4)   |
| DVT or PE                                 | 19 (0.4) | 2.3 (1.5-3.6)  | 76 (0.5)  | 2.3 (1.9-2.9)   |
| ATE                                       | 1 (0.02) | 0.1 (0.02-0.9) | 10 (0.07) | 0.3 (0.2-0.6)   |
| DVT or PE or ATE                          | 20 (0.4) | 2.4 (1.6-3.7)  | 83 (0.5)  | 2.5 (2.0-3.1)   |
| All-cause death                           | 2 (0.04) | 0.2 (0.06-1.0) | 21 (0.1)  | 0.6 (0.4-1.0)   |

---

<sup>a</sup> The total number of patients at risk (i.e., denominator) differed depending on whether the outcome event was chronic or acute.

Therefore, the denominator was not always 5083 for the AA cohort and 15,249 for the non-AA cohort.

<sup>b</sup> Excluding nonmelanoma skin cancer.

AA, alopecia areata; AT, alopecia totalis; ATE, arterial thromboembolism; AU, alopecia universalis; BCC, basal cell carcinoma;

CABG, coronary artery bypass graft; DVT, deep vein thrombosis; IP, incidence proportion; IR, incidence rate; MACE, major adverse cardiovascular event; MI, myocardial infarction; PCI, percutaneous coronary intervention; PE, pulmonary embolism SCC, squamous cell carcinoma.

**Table S4.** Incidence Proportions and Incidence Rates per 1000 Person-Years for Outcome Events of Interest in the AA and Matched Non-AA Cohorts, ages ≥51 years

| Outcome Events                              | AA cohort<br>(n=3303) <sup>a</sup> |                  | Non-AA cohort<br>(n=9909) <sup>a</sup> |                  |
|---------------------------------------------|------------------------------------|------------------|----------------------------------------|------------------|
|                                             | n (IP)                             | IR (95% CI)      | n (IP)                                 | IR (95% CI)      |
| Serious infection requiring hospitalization | 220 (6.7)                          | 36.0 (31.6-41.1) | 1008 (10.2)                            | 41.1 (38.6-43.7) |
| Herpes zoster infection                     | 83 (2.5)                           | 13.3 (10.7-16.5) | 325 (3.3)                              | 12.8 (11.5-14.3) |
| Herpes simplex infection                    | 120 (3.6)                          | 19.4 (16.2-23.2) | 227 (2.3)                              | 8.9 (7.8-10.1)   |
| Any primary malignancy <sup>b</sup>         | 137 (4.7)                          | 24.9 (21.0-29.4) | 564 (6.2)                              | 24.5 (22.6-26.6) |
| BCC                                         | 94 (3.0)                           | 15.8 (12.9-19.3) | 317 (3.3)                              | 12.8 (11.4-14.2) |
| SCC                                         | 74 (2.3)                           | 12.1 (9.7-15.2)  | 232 (2.4)                              | 9.2 (8.1-10.4)   |
| Malignant melanoma                          | 16 (0.5)                           | 2.5 (1.6-4.1)    | 49 (0.5)                               | 1.9 (1.4-2.5)    |
| Lymphoma                                    | 10 (0.3)                           | 1.6 (0.9-2.9)    | 37 (0.4)                               | 1.4 (1.0-2.0)    |
| Female breast cancer                        | 32 (1.4)                           | 7.2 (5.1-10.2)   | 131 (1.9)                              | 7.2 (6.0-8.5)    |
| Cervical carcinoma in situ                  | 1 (0.03)                           | 0.2 (0.02-1.1)   | 5 (0.05)                               | 0.2 (0.08-0.5)   |

|                                           |           |                  |            |                  |
|-------------------------------------------|-----------|------------------|------------|------------------|
| MACE                                      | 192 (6.4) | 34.5 (29.9-39.7) | 921 (10.0) | 40.4 (37.9-43.1) |
| Cardiovascular death                      | 23 (0.7)  | 3.6 (2.4-5.4)    | 167 (1.7)  | 6.4 (5.5-7.5)    |
| Acute MI                                  | 40 (1.2)  | 6.4 (4.7-8.8)    | 260 (2.6)  | 10.3 (9.1-11.6)  |
| Unstable angina                           | 17 (0.5)  | 2.7 (1.7-4.3)    | 96 (1.0)   | 3.7 (3.1-4.6)    |
| Ischemic stroke                           | 100 (3.2) | 16.7 (13.7-20.3) | 420 (4.4)  | 17.0 (15.5-18.7) |
| Hemorrhagic stroke                        | 29 (0.8)  | 4.6 (3.2-6.6)    | 85 (0.9)   | 3.3 (2.7-4.1)    |
| Hospitalization due to heart failure      | 71 (2.2)  | 11.5 (9.1-14.6)  | 413 (4.2)  | 16.5 (15.0-18.2) |
| Coronary revascularization by PCI or CABG | 40 (1.2)  | 6.5 (4.8-8.9)    | 242 (2.5)  | 9.8 (8.6-11.1)   |
| DVT                                       | 35 (1.1)  | 5.7 (4.1-7.9)    | 189 (1.9)  | 7.4 (6.4-8.6)    |
| PE                                        | 18 (0.5)  | 2.9 (1.8-4.6)    | 105 (1.1)  | 4.1 (3.4-5.0)    |
| DVT or PE                                 | 46 (1.4)  | 7.5 (5.6-10.0)   | 253 (2.6)  | 10.0 (8.9-11.3)  |
| ATE                                       | 12 (0.4)  | 1.9 (1.1-3.3)    | 47 (0.5)   | 1.8 (1.4-2.4)    |
| DVT or PE or ATE                          | 54 (1.7)  | 8.8 (6.8-11.5)   | 287 (2.9)  | 11.4 (10.2-12.8) |
| All-cause death                           | 61 (1.8)  | 9.6 (7.5-12.3)   | 447 (4.5)  | 17.2 (15.7-18.9) |

---

<sup>a</sup> The total number of patients at risk (i.e., denominator) differed depending on whether the outcome event was chronic or acute.

Therefore, the denominator was not always 3303 for the AA cohort and 9909 for the non-AA cohort.

<sup>b</sup> Excluding nonmelanoma skin cancer.

AA, alopecia areata; AT, alopecia totalis; ATE, arterial thromboembolism; AU, alopecia universalis; BCC, basal cell carcinoma;

CABG, coronary artery bypass graft; DVT, deep vein thrombosis; IP, incidence proportion; IR, incidence rate; MACE, major adverse cardiovascular event; MI, myocardial infarction; PCI, percutaneous coronary intervention; PE, pulmonary embolism SCC, squamous cell carcinoma.

**Table S5.** Incidence Proportion and Incidence Rates per 1000 Person-Years for Outcome Events of Interest in Patients With AT/AU and Non-AT/AU AA

| Outcome Events                      | AA cohort<br>AT/AU subtype<br>(n=599) <sup>a</sup> |                  | AA cohort<br>non-AT/AU subtype<br>(n=8185) <sup>a</sup> |                  |
|-------------------------------------|----------------------------------------------------|------------------|---------------------------------------------------------|------------------|
|                                     | n (IP)                                             | IR (95% CI)      | n (IP)                                                  | IR (95% CI)      |
|                                     | Serious infection requiring hospitalization        | 48 (8.0)         | 43.3 (32.6-57.4)                                        | 233 (2.8)        |
| Herpes zoster infection             | 12 (2.0)                                           | 10.4 (5.9-18.3)  | 107 (1.3)                                               | 7.5 (6.2-9.1)    |
| Herpes simplex infection            | 25 (4.2)                                           | 22.1 (14.9-32.6) | 269 (3.3)                                               | 19.3 (17.1-21.7) |
| Any primary malignancy <sup>b</sup> | 18 (3.3)                                           | 17.3 (10.9-27.5) | 163 (2.0)                                               | 12.1 (10.4-14.2) |
| BCC                                 | 11 (1.9)                                           | 9.7 (5.4-17.4)   | 107 (1.3)                                               | 7.7 (6.4-9.3)    |
| SCC                                 | 11 (1.9)                                           | 9.7 (5.4-17.6)   | 68 (0.8)                                                | 4.8 (3.8-6.1)    |
| Malignant melanoma                  | 2 (0.3)                                            | 1.7 (0.4-6.9)    | 20 (0.2)                                                | 1.4 (0.9-2.2)    |
| Lymphoma                            | 2 (0.3)                                            | 1.7 (0.4-6.9)    | 17 (0.2)                                                | 1.2 (0.7-1.9)    |

|                                           |          |                  |           |                  |
|-------------------------------------------|----------|------------------|-----------|------------------|
| Female breast cancer                      | 3 (0.7)  | 3.8 (1.2-11.8)   | 36 (0.8)  | 4.6 (3.4-6.4)    |
| Cervical carcinoma in situ                | 0 (0)    | 0 (0)            | 8 (0.1)   | 0.6 (0.3-1.1)    |
| MACE                                      | 34 (6.1) | 32.3 (23.1-45.2) | 200 (2.5) | 14.8 (12.9-17.0) |
| Cardiovascular death                      | 1 (0.2)  | 0.9 (0.1-6.1)    | 22 (0.3)  | 1.5 (1.0-2.3)    |
| Acute MI                                  | 12 (2.0) | 10.4 (5.9-18.3)  | 51 (0.6)  | 3.6 (2.7-4.7)    |
| Unstable angina                           | 1 (0.2)  | 0.9 (0.1-6.1)    | 19 (0.2)  | 1.3 (0.9-2.1)    |
| Ischemic stroke                           | 17 (2.9) | 15.2 (9.5-24.5)  | 114 (1.4) | 8.2 (6.8-9.8)    |
| Hemorrhagic stroke                        | 2 (0.3)  | 1.7 (0.4-6.9)    | 34 (0.4)  | 2.4 (1.7-3.3)    |
| Hospitalization due to heart failure      | 18 (3.0) | 15.6 (9.8-24.8)  | 95 (1.2)  | 6.7 (5.5-8.2)    |
| Coronary revascularization by PCI or CABG | 10 (1.7) | 8.6 (4.7-16.1)   | 77 (0.9)  | 5.4 (4.3-6.8)    |
| DVT                                       | 9 (1.5)  | 7.9 (4.1-15.2)   | 37 (0.5)  | 2.6 (1.9-3.6)    |
| PE                                        | 9 (1.5)  | 7.8 (4.1-15.0)   | 21 (0.3)  | 1.5 (1.0-2.3)    |
| DVT or PE                                 | 16 (2.7) | 14.2 (8.7-23.2)  | 49 (0.6)  | 3.5 (2.6-4.6)    |
| ATE                                       | 3 (0.5)  | 2.6 (0.8-8.0)    | 10 (0.1)  | 0.7 (0.4-1.3)    |

|                  |          |                  |          |               |
|------------------|----------|------------------|----------|---------------|
| DVT or PE or ATE | 18 (3.0) | 16.1 (10.1-25.5) | 56 (0.7) | 4.0 (3.1-5.2) |
| All-cause death  | 9 (1.5)  | 7.7 (4.0-14.8)   | 55 (0.7) | 3.8 (2.9-5.0) |

---

<sup>a</sup> The total number of patients at risk (i.e., denominator) differed depending on whether the outcome event was chronic or acute.

Therefore, the denominator was not always 599 for the AT/AU subtype or 8185 for the non-AT/AU subtype cohort.

<sup>b</sup> Excluding nonmelanoma skin cancer.

AA, alopecia areata; AT, alopecia totalis; ATE, arterial thromboembolism; AU, alopecia universalis; BCC, basal cell carcinoma;

CABG, coronary artery bypass graft; DVT, deep vein thrombosis; IP, incidence proportion; IR, incidence rate; MACE, major adverse cardiovascular event; MI, myocardial infarction; PCI, percutaneous coronary intervention; PE, pulmonary embolism SCC, squamous cell carcinoma.
